# Supplementary material
Source: publisher figshare collection journal article supplement (https://acs.figshare.com/ndownloader/files/5694291)
Supplement: Supplementary file 1 [file 5694291]

ic020379l.cif

data_General
_audit_creation_date                  'Tue May  7 16:39:16 2002'
_audit_creation_method                'by teXsan'
_audit_update_record
                 ?
#----------------------------------------------------------
# PROCESSING SUMMARY (IUCr Office Use Only)
_journal_date_recd_electronic          ?
_journal_date_from_coeditor            ?
_journal_date_accepted                 ?
_journal_coeditor_code
?
#-------------------------------------------------------------------------
# SUBMISSION DETAILS
_publ_contact_author_name             ' ENTER NA
ME'
_publ_contact_author_address
;
      ENTER ADDRESS
;
_publ_contact_author_
email            ' ENTER EMAIL ADDRESS '
_publ_contact_author_fax
    ' ENTER FAX NUMBER '
_publ_contact_author_phone            ' ENTER PHONE N
UMBER '
_publ_contact_letter
;
      ENTER TEXT OF LETTER
;
_publ_requested_jo
urnal               ' ENTER JOURNAL NAME HERE'
_publ_requested_category
          ' FM'

_publ_requested_coeditor_name          ?
#-------------------
# TITLE AND AUTH
OR LIST

_publ_section_title
;
      ENTER SECTION TITLE
;

_publ_section_tit
le_footnote
;
      ENTER FOOTNOTE TO TITLE OF PAPER
;
loop_
_publ_author_name

_publ_author_footnote
_publ_author_address
' FIRST AUTHORS NAME '
;
    FIRST
AUTHORS FOOTNOTES
;
;
    FIRST AUTHORS ADDRESS
;
_publ_section_synopsis
;
    E
NTER SYNOPSIS
;
#-----------------------------------------------------------
# TEXT

_publ_section_abstract
;
      ENTER ABSTRACT
;


_publ_section_comment
;
      ENTER TEXT
;

_publ_section_acknowledgements
;

    ENTER ACKNOWLEDGEMENTS
;

_publ_section_references
;
      ENTER OTHER REFER
ENCES
Molecular Structure Corporation, Rigaku Corporation. (2000). teXsan.

Single Crystal Structure Analysis Software. Version 1.11.
MSC, 3200 Research
Forest Drive, The Woodlands, TX 77381, USA.
Rigaku, 3-9-12 Akishima, Tokyo,
Japan.
;

_publ_section_figure_captions
;
      ENTER FIGURE CAPTIONS
;

_publ
_section_exptl_prep
;
      ENTER COMPOUND PREPARATION DETAILS
;

_publ_sectio
n_exptl_refinement
;
      ENTER SPECIAL DETAILS OF THE REFINEMENT
;
#--------
data_
[Ag(dman)0.5(ClO4)(p-xylen
#------------------------------------------------
# CHEMICAL DATA
_chemical_formula_sum
            'C32 H34 Ag2 Cl2 O8 '
_chemical_formula_moiety               'C32
H34 Ag2 Cl2 O8 '
_chemical_formula_weight               833.26
_chemical_mel
ting_point                ?
#-----------------------------------------------
# CRYSTAL DATA
_symmetry_cell_setting
            monoclinic
_symmetry_space_group_name_H-M        'P 1 21/n 1'
_sym
metry_space_group_name_Hall        '-P 2yn'
_symmetry_Int_Tables_number
        14
loop_
_symmetry_equiv_pos_as_xyz
x,y,z
1/2-x,1/2+y,1/2-z
-x,-y,-z
1
/2+x,1/2-y,1/2+z
_cell_length_a                         7.885(2)
_cell_lengt
h_b                         12.345(2)
_cell_length_c
17.059(3)
_cell_angle_alpha                      90
_cell_angle_beta
                97.32(2)
_cell_angle_gamma                      90
_cell_volum
e                           1646.9(6)
_cell_formula_units_Z
2
_cell_measurement_reflns_used          25
_cell_measurement_theta_min
        11.2
_cell_measurement_theta_max            12.5
_cell_measurement_tem
perature          296.2
#---------------------------------------------------
_exptl_crystal_description            'brick'
_e
xptl_crystal_colour                 'yellow'
_exptl_crystal_size_max
         0.300
_exptl_crystal_size_mid                0.200
_exptl_crystal_siz
e_min                0.200
_exptl_crystal_size_rad                ?
_exptl_c
rystal_density_diffrn          1.680
_exptl_crystal_density_meas
?
_exptl_crystal_density_method         'not measured'
_exptl_crystal_F_000
                  '836.0'
_exptl_absorpt_coefficient_mu          1.396
_exptl_
absorpt_correction_type         none
#--------------------------------------
# EXPERIMENTAL DATA
_diffrn_radiat
ion_type                'Mo K\a'
_diffrn_radiation_wavelength           0.71
07
_diffrn_measurement_device_type       'Rigaku AFC7R'
_diffrn_measurement_
method             \w-2\q
_diffrn_reflns_number                  3130
_diffr
n_reflns_av_R_equivalents        0.018
_diffrn_reflns_theta_min
   ?
_diffrn_reflns_theta_max               25.00
_diffrn_reflns_theta_full
            25.00
_diffrn_measured_fraction_theta_max    1.00
_diffrn_measured
_fraction_theta_full   1.00
_diffrn_reflns_limit_h_min             -9
_diffr
n_reflns_limit_h_max             0
_diffrn_reflns_limit_k_min             0

_diffrn_reflns_limit_k_max             14
_diffrn_reflns_limit_l_min
      -20
_diffrn_reflns_limit_l_max             20
_diffrn_standards_number
             3
_diffrn_standards_interval_count      150
_diffrn_standards_dec
ay_%             14.85
#----------------------------------------------------
# REFINEMENT DATA
_refine_special_details
;
Refi
nement using reflections with F^2^ > -10.0 sigma(F^2^). The weighted
R-fact
or (wR) and goodness of fit (S) are based on F^2^. R-factor (gt) are
based
on F. The threshold expression of F^2^ > 2.0 sigma(F^2^) is used only
for c
alculating R-factor (gt).
;
_reflns_number_total                   2906
_ref
lns_number_gt                      1974
_reflns_threshold_expression
         >2.0sigma(I)
_refine_ls_structure_factor_coef            Fsqd
_refine
_ls_R_factor_gt                 0.0567
_refine_ls_wR_factor_ref
   0.2047
_refine_ls_hydrogen_treatment          noref
_refine_ls_number_refln
s               1974
_refine_ls_number_parameters           199
_refine_ls_g
oodness_of_fit_ref         1.097
_refine_ls_weighting_scheme            calc

_refine_ls_weighting_details
     'w = 1/[\s^2^(Fo^2^) + (0.10
16P)^2^+5.6717P] where P=(Fo^2^+2Fc^2^)/3'
_refine_ls_shift/su_max
       0.0010
_refine_ls_extinction_method           SHELXL
_refine_ls_extinct
ion_coef             0.0000
_refine_ls_extinction_expression
   'Fc^*^=kFc[1+0
.001xFc^2^\l^3^/sin(2\q)]^-1/4^'
_refine_diff_density_max               0.78

_refine_diff_density_min               -0.87
loop_
_atom_type_symbol
_atom_
type_description
_atom_type_scat_dispersion_real
_atom_type_scat_dispersion_
imag
_atom_type_scat_source
    'Ag' 'Ag'  -0.897 1.101
;International Tables
for Crystallography
(1992, Vol. C, Tables 4.2.6.8 and 6.1.1.4)
;
    'Cl' 'Cl'
   0.148 0.159
;International Tables for Crystallography
(1992, Vol. C, Table
s 4.2.6.8 and 6.1.1.4)
;
    'O' 'O'  0.011 0.006
;International Tables for C
rystallography
(1992, Vol. C, Tables 4.2.6.8 and 6.1.1.4)
;
    'C' 'C'  0.003
0.002
;International Tables for Crystallography
(1992, Vol. C, Tables 4.2.6
.8 and 6.1.1.4)
;
    'H' 'H'  0.000 0.000
;International Tables for Crystall
ography
(1992, Vol. C, Table 6.1.1.4)
;
#-----------------------------------
# ATOMIC COORDINATES AND DISPLAC
EMENT PARAMETERS
loop_
_atom_site_label
_atom_site_type_symbol
_atom_site_f
ract_x
_atom_site_fract_y
_atom_site_fract_z
_atom_site_U_iso_or_equiv
_atom
_site_adp_type
_atom_site_occupancy
_atom_site_calc_flag
_atom_site_refineme
nt_flags
_atom_site_disorder_assembly
_atom_site_disorder_group
   Ag(1)  Ag 0
.42728(8)  0.15653(6)  1.00873(5)  0.0648(3)   Uani 1.00 d . . .
   Cl(1)  Cl
0.5030(5)   0.0277(2)   0.8368(2)   0.0854(9)   Uani 1.00 d . . .
   O(1)   O
0.451(2)    0.1304(7)   0.8113(6)   0.130(4)    Uani 1.00 d . . .
   O(2)   O
0.498(2)    0.0115(7)   0.9163(5)   0.144(5)    Uani 1.00 d . . .
   O(3)   O
0.456(4)    -0.050(1)   0.791(1)    0.31(2)     Uani 1.00 d . . .
   O(4)   O
0.672(3)    0.028(2)    0.838(2)    0.35(2)     Uani 1.00 d . . .
   C(1)   C
0.639(1)    0.2919(8)   0.9760(6)   0.062(2)    Uani 1.00 d . . .
   C(2)   C
0.712(1)    0.2324(8)   1.0373(7)   0.069(3)    Uani 1.00 d . . .
   C(3)   C
0.721(1)    0.2756(10)  1.1142(7)   0.076(3)    Uani 1.00 d . . .
   C(4)   C
0.662(1)    0.3730(9)   1.1262(6)   0.070(3)    Uani 1.00 d . . .
   C(5)   C
0.578(1)    0.4396(7)   1.0644(5)   0.055(2)    Uani 1.00 d . . .
   C(6)   C
0.565(1)    0.3972(7)   0.9855(5)   0.055(2)    Uani 1.00 d . . .
   C(7)   C
0.514(1)    0.5425(8)   1.0793(5)   0.061(2)    Uani 1.00 d . . .
   C(8)   C
0.523(2)    0.5881(10)  1.1619(6)   0.092(4)    Uani 1.00 d . . .
   C(9)   C
0.147(1)    0.182(1)    1.0487(8)   0.083(4)    Uani 1.00 d . . .
   C(10)  C
0.106(1)    0.158(1)    0.971(1)    0.093(4)    Uani 1.00 d . . .
   C(11)  C
0.074(1)    0.236(2)    0.9130(7)   0.095(4)    Uani 1.00 d . . .
   C(12)  C
0.127(2)    0.365(1)    1.014(1)    0.103(5)    Uani 1.00 d . . .
   C(13)  C
0.087(2)    0.339(1)    0.942(1)    0.110(5)    Uani 1.00 d . . .
   C(14)  C
0.156(1)    0.291(2)    1.0719(8)   0.101(5)    Uani 1.00 d . . .
   C(15)  C
0.201(2)    0.321(2)    1.156(1)    0.20(1)     Uani 1.00 d . . .
   C(16)  C
0.026(2)    0.201(3)    0.827(1)    0.20(1)     Uani 1.00 d . . .
   H(1)   H
0.6351      0.2632      0.9241      0.0739      Uiso 1.00 calc . . .
   H(2)
H  0.7562      0.1624      1.0288      0.0833      Uiso 1.00 calc . . .
   H(3
)   H  0.7709      0.2338      1.1579      0.0913      Uiso 1.00 calc . . .

H(4)   H  0.6758      0.4006      1.1786      0.0842      Uiso 1.00 calc . .
.
   H(5)   H  0.6390      0.5926      1.1848      0.1100      Uiso 1.00 calc
. . .
   H(6)   H  0.4619      0.5421      1.1931      0.1100      Uiso 1.00 c
alc . . .
   H(7)   H  0.4734      0.6584      1.1596      0.1100      Uiso 1.
00 calc . . .
   H(8)   H  0.1696      0.1263      1.0867      0.0999      Uis
o 1.00 calc . . .
   H(9)   H  0.0983      0.0841      0.9553      0.1112
Uiso 1.00 calc . . .
   H(10)  H  0.1369      0.4397      1.0268      0.1236
     Uiso 1.00 calc . . .
   H(11)  H  0.0632      0.3961      0.9050      0.132
2      Uiso 1.00 calc . . .
   H(12)  H  0.2168      0.2574      1.1870      0
.2432      Uiso 1.00 calc . . .
   H(13)  H  0.3045      0.3619      1.1616
    0.2432      Uiso 1.00 calc . . .
   H(14)  H  0.1123      0.3636      1.1727
       0.2432      Uiso 1.00 calc . . .
   H(15)  H  0.0090      0.2632      0.7
944      0.2367      Uiso 1.00 calc . . .
   H(16)  H  -0.0758     0.1594
0.8228      0.2367      Uiso 1.00 calc . . .
   H(17)  H  0.1163      0.1585
     0.8113      0.2367      Uiso 1.00 calc . . .

loop_
_atom_site_aniso_labe
l
_atom_site_aniso_U_11
_atom_site_aniso_U_22
_atom_site_aniso_U_33
_atom_si
te_aniso_U_12
_atom_site_aniso_U_13
_atom_site_aniso_U_23
   Ag(1)  0.0537(4)
   0.0548(5)   0.0874(6)   0.0021(3)   0.0147(3)   0.0025(4)
   Cl(1)  0.140(3
)    0.057(1)    0.061(2)    0.009(2)    0.015(2)    0.003(1)
   O(1)   0.2
1(1)     0.073(6)    0.103(7)    0.034(6)    0.019(7)    0.026(5)
   O(2)
0.29(1)     0.069(6)    0.083(6)    0.052(7)    0.056(7)    0.017(4)
   O(3
)   0.62(5)     0.12(1)     0.16(1)     -0.10(2)    -0.05(2)    -0.04(1)

O(4)   0.19(2)     0.38(4)     0.50(4)     0.14(2)     0.17(2)     0.23(3)

   C(1)   0.062(5)    0.055(5)    0.072(6)    -0.010(5)   0.024(5)    -0.003
(5)
   C(2)   0.049(5)    0.060(6)    0.101(8)    0.006(4)    0.015(5)    0.
006(6)
   C(3)   0.064(6)    0.079(8)    0.082(7)    -0.010(5)   -0.006(5)
   0.029(6)
   C(4)   0.071(6)    0.073(7)    0.064(6)    -0.010(5)   0.000(5
)    0.006(5)
   C(5)   0.061(5)    0.055(5)    0.048(5)    -0.010(4)   0.0
05(4)    0.010(4)
   C(6)   0.064(5)    0.042(4)    0.059(5)    -0.013(4)
0.014(4)    0.003(4)
   C(7)   0.077(6)    0.052(5)    0.055(5)    -0.013(4
)   0.010(4)    -0.005(4)
   C(8)   0.15(1)     0.075(7)    0.049(6)    -0.0
09(8)   0.008(6)    0.008(5)
   C(9)   0.048(5)    0.110(10)   0.096(9)
0.018(6)    0.023(5)    0.031(8)
   C(10)  0.050(6)    0.092(9)    0.14(1)
     -0.016(6)   0.029(7)    -0.029(9)
   C(11)  0.060(6)    0.16(1)     0.066
(7)    -0.011(8)   0.001(5)    0.004(9)
   C(12)  0.069(7)    0.075(9)    0
.17(2)     -0.004(6)   0.019(9)    -0.03(1)
   C(13)  0.070(8)    0.10(1)
    0.16(2)     0.019(8)    0.022(9)    0.05(1)
   C(14)  0.042(5)    0.17(2
)     0.089(9)    -0.003(8)   0.014(5)    -0.03(1)
   C(15)  0.10(1)     0.
35(4)     0.16(2)     -0.02(2)    0.02(1)     -0.15(2)
   C(16)  0.11(1)
   0.39(4)     0.09(1)     -0.02(2)    0.010(9)    -0.06(2)
#--------------
_computing_
data_collection            'MSC/AFC Diffractometer Control'
_computing_cell_
refinement            'MSC/AFC Diffractometer Control'
_computing_data_reduc
tion             'teXsan Ver. 1.11'
_computing_structure_solution          M
ITHRIL90
_computing_structure_refinement       'SHELXL97'
_computing_publica
tion_material       'teXsan Ver. 1.11'
_computing_molecular_graphics
   ?
#------------------------------------------------------------------------
_geom_special_details
;
   ?
;
loop_
_geom_bond_atom_site_label_1
_geom
_bond_atom_site_label_2
_geom_bond_distance
_geom_bond_site_symmetry_1
_geom
_bond_site_symmetry_2
_geom_bond_publ_flag
   Ag(1)     O(2)      2.494(10)  .
. yes
   Ag(1)     O(2)      2.469(9)   . 3_657 yes
   Ag(1)     C(1)      2.474
(10)  . . yes
   Ag(1)     C(2)      2.422(9)   . . yes
   Ag(1)     C(9)      2
.42(1)    . . yes
   Ag(1)     C(10)     2.54(1)    . . yes
   Cl(1)     O(1)
    1.387(10)  . . yes
   Cl(1)     O(2)      1.377(10)  . . yes
   Cl(1)     O(3)
       1.26(2)    . . yes
   Cl(1)     O(4)      1.33(2)    . . yes
   C(1)      C
(2)      1.35(1)    . . yes
   C(1)      C(6)      1.44(1)    . . yes
   C(1)
    H(1)      0.950      . . no
   C(2)      C(3)      1.41(2)    . . yes
   C(2)
      H(2)      0.950      . . no
   C(3)      C(4)      1.32(2)    . . yes
   C(3
)      H(3)      0.950      . . no
   C(4)      C(5)      1.43(1)    . . yes

C(4)      H(4)      0.950      . . no
   C(5)      C(6)      1.43(1)    . . ye
s
   C(5)      C(7)      1.40(1)    . . yes
   C(6)      C(7)      1.41(1)    .
3_667 yes
   C(7)      C(8)      1.51(1)    . . yes
   C(8)      H(5)      0.950
       . . no
   C(8)      H(6)      0.950      . . no
   C(8)      H(7)      0.95
0      . . no
   C(9)      C(10)     1.36(2)    . . yes
   C(9)      C(14)     1
.40(3)    . . yes
   C(9)      H(8)      0.950      . . no
   C(10)     C(11)
   1.38(2)    . . yes
   C(10)     H(9)      0.950      . . no
   C(11)     C(13)
     1.35(3)    . . yes
   C(11)     C(16)     1.53(2)    . . yes
   C(12)     C(1
3)     1.27(3)    . . yes
   C(12)     C(14)     1.35(3)    . . yes
   C(12)
H(10)     0.950      . . no
   C(13)     H(11)     0.950      . . no
   C(14)
   C(15)     1.48(3)    . . yes
   C(15)     H(12)     0.949      . . no
   C(15)
     H(13)     0.950      . . no
   C(15)     H(14)     0.951      . . no
   C(16)
      H(15)     0.950      . . no
   C(16)     H(16)     0.950      . . no
   C(16
)     H(17)     0.949      . . no
#-----------------------------------------
loop_
_geom_angle_atom_site_label_1
_g
eom_angle_atom_site_label_2
_geom_angle_atom_site_label_3
_geom_angle
_geom_
angle_site_symmetry_1
_geom_angle_site_symmetry_2
_geom_angle_site_symmetry_
3
_geom_angle_publ_flag
     O(2)      Ag(1)     O(2)      70.5(4)    . . 3_65
7 yes
     O(2)      Ag(1)     C(1)      97.6(4)    . . . yes
     O(2)      Ag(
1)     C(2)      97.5(4)    . . . yes
     O(2)      Ag(1)     C(9)      123.9
(4)   . . . yes
     O(2)      Ag(1)     C(10)     98.0(5)    . . . yes
     O(2
)      Ag(1)     C(1)      124.1(4)   3_657 . . yes
     O(2)      Ag(1)     C
(2)      93.8(4)    3_657 . . yes
     O(2)      Ag(1)     C(9)      97.6(5)
   3_657 . . yes
     O(2)      Ag(1)     C(10)     107.8(4)   3_657 . . yes

C(1)      Ag(1)     C(2)      31.9(3)    . . . yes
     C(1)      Ag(1)     C(
9)      129.9(4)   . . . yes
     C(1)      Ag(1)     C(10)     128.1(4)   . .
. yes
     C(2)      Ag(1)     C(9)      138.5(4)   . . . yes
     C(2)      Ag(
1)     C(10)     156.7(4)   . . . yes
     C(9)      Ag(1)     C(10)     31.8(
5)    . . . yes
     O(1)      Cl(1)     O(2)      113.4(6)   . . . yes
     O(1
)      Cl(1)     O(3)      116(1)     . . . yes
     O(1)      Cl(1)     O(4)
      104(1)     . . . yes
     O(2)      Cl(1)     O(3)      117.1(10)  . . . y
es
     O(2)      Cl(1)     O(4)      98(1)      . . . yes
     O(3)      Cl(1)
     O(4)      103(2)     . . . yes
     Ag(1)     O(2)      Ag(1)     109.5(4)
   . . 3_657 yes
     Ag(1)     O(2)      Cl(1)     123.7(5)   . . . yes
     Ag(1
)     O(2)      Cl(1)     126.6(6)   3_657 . . yes
     Ag(1)     C(1)      C(
2)      71.9(6)    . . . yes
     Ag(1)     C(1)      C(6)      107.1(6)   . .
. yes
     Ag(1)     C(1)      H(1)      91.0       . . . no
     C(2)      C(1)
       C(6)      122.9(9)   . . . yes
     C(2)      C(1)      H(1)      118.6
     . . . no
     C(6)      C(1)      H(1)      118.6      . . . no
     Ag(1)
   C(2)      C(1)      76.2(6)    . . . yes
     Ag(1)     C(2)      C(3)      1
05.7(7)   . . . yes
     Ag(1)     C(2)      H(2)      88.2       . . . no

C(1)      C(2)      C(3)      118.9(10)  . . . yes
     C(1)      C(2)      H(
2)      120.5      . . . no
     C(3)      C(2)      H(2)      120.6      . .
. no
     C(2)      C(3)      C(4)      120(1)     . . . yes
     C(2)      C(3)
       H(3)      119.6      . . . no
     C(4)      C(3)      H(3)      119.5
    . . . no
     C(3)      C(4)      C(5)      123.4(10)  . . . yes
     C(3)
   C(4)      H(4)      118.3      . . . no
     C(5)      C(4)      H(4)      11
8.3      . . . no
     C(4)      C(5)      C(6)      116.8(8)   . . . yes
     C
(4)      C(5)      C(7)      122.0(8)   . . . yes
     C(6)      C(5)      C(7
)      121.3(8)   . . . yes
     C(1)      C(6)      C(5)      117.1(8)   . .
. yes
     C(1)      C(6)      C(7)      122.1(8)   . . 3_667 yes
     C(5)
C(6)      C(7)      120.7(8)   . . 3_667 yes
     C(5)      C(7)      C(6)
   118.0(8)   . . 3_667 yes
     C(5)      C(7)      C(8)      122.3(8)   . . .
yes
     C(6)      C(7)      C(8)      119.7(9)   3_667 . . yes
     C(7)      C
(8)      H(5)      109.4      . . . no
     C(7)      C(8)      H(6)      109.
5      . . . no
     C(7)      C(8)      H(7)      109.5      . . . no
     H(5)
       C(8)      H(6)      109.5      . . . no
     H(5)      C(8)      H(7)
   109.5      . . . no
     H(6)      C(8)      H(7)      109.5      . . . no

Ag(1)     C(9)      C(10)     79.0(7)    . . . yes
     Ag(1)     C(9)      C(
14)     101.1(8)   . . . yes
     Ag(1)     C(9)      H(8)      89.9       . .
. no
     C(10)     C(9)      C(14)     118(1)     . . . yes
     C(10)     C(9)
       H(8)      120.5      . . . no
     C(14)     C(9)      H(8)      120.5
    . . . no
     Ag(1)     C(10)     C(9)      69.2(6)    . . . yes
     Ag(1)
   C(10)     C(11)     105.9(8)   . . . yes
     Ag(1)     C(10)     H(9)      9
4.9       . . . no
     C(9)      C(10)     C(11)     122(1)     . . . yes

C(9)      C(10)     H(9)      118.6      . . . no
     C(11)     C(10)     H(9
)      118.6      . . . no
     C(10)     C(11)     C(13)     113(1)     . . .
yes
     C(10)     C(11)     C(16)     118(1)     . . . yes
     C(13)     C(11)
      C(16)     127(1)     . . . yes
     C(13)     C(12)     C(14)     122(1)
    . . . yes
     C(13)     C(12)     H(10)     118.7      . . . no
     C(14)
   C(12)     H(10)     118.7      . . . no
     C(11)     C(13)     C(12)     12
6(1)     . . . yes
     C(11)     C(13)     H(11)     117.0      . . . no
     C
(12)     C(13)     H(11)     117.0      . . . no
     C(9)      C(14)     C(12
)     116(1)     . . . yes
     C(9)      C(14)     C(15)     120(1)     . . .
yes
     C(12)     C(14)     C(15)     122(2)     . . . yes
     C(14)     C(15)
      H(12)     109.5      . . . no
     C(14)     C(15)     H(13)     109.4
   . . . no
     C(14)     C(15)     H(14)     109.4      . . . no
     H(12)
C(15)     H(13)     109.6      . . . no
     H(12)     C(15)     H(14)     109
.5      . . . no
     H(13)     C(15)     H(14)     109.4      . . . no
     C(1
1)     C(16)     H(15)     109.4      . . . no
     C(11)     C(16)     H(16)
     109.4      . . . no
     C(11)     C(16)     H(17)     109.5      . . . no

    H(15)     C(16)     H(16)     109.5      . . . no
     H(15)     C(16)     H
(17)     109.5      . . . no
     H(16)     C(16)     H(17)     109.6      . .
. no
#----------------------------------------------------------------------
loop_
_geom_contact_atom_site_label_1
_geom_contact_atom_site_label
_2
_geom_contact_distance
_geom_contact_site_symmetry_1
_geom_contact_site_s
ymmetry_2
_geom_contact_publ_flag
   Ag(1)     C(10)     2.54(1)    . . ?
   O(1
)      C(15)     3.55(2)    . 4_554 ?
   O(4)      C(16)     3.54(4)    . 1_65
5 ?
   C(2)      C(9)      3.47(1)    . 1_655 ?
   C(2)      C(14)     3.55(1)
   . 1_655 ?
   C(2)      C(10)     3.56(2)    . 1_655 ?
   C(3)      C(14)     3.
60(2)    . 1_655 ?
   Ag(1)     C(10)     2.54(1)    . . ?
#===END

data_General
_audit_creation_date                  'Tue May  7 15:24:27 200
2'
_audit_creation_method                'by teXsan'
_audit_update_record
                 ?
#----------------------------------------------------------
# PROCESSING SUMMARY (IUCr Office Use Only)
_journal_d
ate_recd_electronic          ?
_journal_date_from_coeditor            ?
_jou
rnal_date_accepted                 ?
_journal_coeditor_code
?
#-------------------------------------------------------------------------
# SUBMISSION DETAILS
_publ_contact_author_name             ' ENTER NA
ME'
_publ_contact_author_address
;
      ENTER ADDRESS
;
_publ_contact_author_
email            ' ENTER EMAIL ADDRESS '
_publ_contact_author_fax
    ' ENTER FAX NUMBER '
_publ_contact_author_phone            ' ENTER PHONE N
UMBER '
_publ_contact_letter
;
      ENTER TEXT OF LETTER
;
_publ_requested_jo
urnal               ' ENTER JOURNAL NAME HERE'
_publ_requested_category
          ' FM'

_publ_requested_coeditor_name          ?
#-------------------
# TITLE AND AUTH
OR LIST

_publ_section_title
;
      ENTER SECTION TITLE
;

_publ_section_tit
le_footnote
;
      ENTER FOOTNOTE TO TITLE OF PAPER
;
loop_
_publ_author_name

_publ_author_footnote
_publ_author_address
' FIRST AUTHORS NAME '
;
    FIRST
AUTHORS FOOTNOTES
;
;
    FIRST AUTHORS ADDRESS
;
_publ_section_synopsis
;
    E
NTER SYNOPSIS
;
#-----------------------------------------------------------
# TEXT

_publ_section_abstract
;
      ENTER ABSTRACT
;


_publ_section_comment
;
      ENTER TEXT
;

_publ_section_acknowledgements
;

    ENTER ACKNOWLEDGEMENTS
;

_publ_section_references
;
      ENTER OTHER REFER
ENCES
Molecular Structure Corporation, Rigaku Corporation. (2000). teXsan.

Single Crystal Structure Analysis Software. Version 1.11.
MSC, 3200 Research
Forest Drive, The Woodlands, TX 77381, USA.
Rigaku, 3-9-12 Akishima, Tokyo,
Japan.
North, A.C.T., Phillips, D. C. & Mathews, F. S. (1968).
Acta Cryst. A
24, 351-359.
;

_publ_section_figure_captions
;
      ENTER FIGURE CAPTIONS
;


_publ_section_exptl_prep
;
      ENTER COMPOUND PREPARATION DETAILS
;

_publ_
section_exptl_refinement
;
      ENTER SPECIAL DETAILS OF THE REFINEMENT
;
#-------------------------------------------------------------------------

data_[Ag2(dpan)0.5_(CF3SO3)2(be
#-------------------------------------------------------------------------
# CHEMICAL DATA
_chemical_formula_sum
                  'C36 H24 Ag4 F12 O12 S4 '
_chemical_formula_moiety
      'C36 H24 Ag4 F12 O12 S4 '
_chemical_formula_weight               1436.27

_chemical_melting_point                ?
#-------------------------------------------------------------------------
# CRYSTAL DATA
_symmetry_cell
_setting                 triclinic
_symmetry_space_group_name_H-M        'P
-1         '
_symmetry_space_group_name_Hall        '-P 1'
_symmetry_Int_Tab
les_number            2
loop_
_symmetry_equiv_pos_as_xyz
x,y,z
-x,-y,-z
_cel
l_length_a                         10.622(5)
_cell_length_b
         11.474(4)
_cell_length_c                         10.426(4)
_cell_angl
e_alpha                      94.67(3)
_cell_angle_beta
112.93(3)
_cell_angle_gamma                      107.97(3)
_cell_volume
                       1083.2(9)
_cell_formula_units_Z                  1
_cel
l_measurement_reflns_used          25
_cell_measurement_theta_min
15.5
_cell_measurement_theta_max            18.9
_cell_measurement_temperatu
re          296.2
#--------------------------------------------------------------------------
_exptl_crystal_description            'prismatic'
_exp
tl_crystal_colour                 'yellow'
_exptl_crystal_size_max
       0.250
_exptl_crystal_size_mid                0.250
_exptl_crystal_size_
min                0.200
_exptl_crystal_size_rad                ?
_exptl_cry
stal_density_diffrn          2.202
_exptl_crystal_density_meas            ?

_exptl_crystal_density_method         'not measured'
_exptl_crystal_F_000
                '696.0'
_exptl_absorpt_coefficient_mu          2.082
_exptl_ab
sorpt_correction_type         psi-scan
_exptl_absorpt_process_details
'(North, Phillips & Mathews, 1968)'
_exptl_absorpt_correction_T_min        0
.604
_exptl_absorpt_correction_T_max        0.659
#-------------------------------------------------------------------------
# EXPERIMENTAL DATA
_
diffrn_radiation_type                'Mo K\a'
_diffrn_radiation_wavelength
          0.7107
_diffrn_measurement_device_type       'Rigaku AFC7R'
_diffrn_
measurement_method             \w-2\q
_diffrn_reflns_number
5237
_diffrn_reflns_av_R_equivalents        0.012
_diffrn_reflns_theta_min
              ?
_diffrn_reflns_theta_max               27.50
_diffrn_reflns_th
eta_full              27.50
_diffrn_measured_fraction_theta_max    1.00
_dif
frn_measured_fraction_theta_full   1.00
_diffrn_reflns_limit_h_min
    0
_diffrn_reflns_limit_h_max             13
_diffrn_reflns_limit_k_min
          -14
_diffrn_reflns_limit_k_max             14
_diffrn_reflns_limit_l
_min             -13
_diffrn_reflns_limit_l_max             12
_diffrn_stand
ards_number              3
_diffrn_standards_interval_count      150
_diffrn
_standards_decay_%             1.20
#-----------------------------------------------------------------------
# REFINEMENT DATA
_refine_special_d
etails
;
Refinement using reflections with F^2^ > 3.0 sigma(F^2^). The weigh
ted R-factor
(wR), goodness of fit (S) and R-factor (gt) are based on F, wit
h F set to zero
for negative F. The threshold expression of F^2^ > 3.0 sigm
a(F^2^) is used only
for calculating R-factor (gt).
;
_reflns_number_total
                   4967
_reflns_number_gt                      3993
_reflns_th
reshold_expression                >2.0sigma(I)
_refine_ls_structure_factor_c
oef            Fsqd
_refine_ls_R_factor_gt                 0.0535
_refine_ls
_wR_factor_ref               0.1567
_refine_ls_hydrogen_treatment          n
oref
_refine_ls_number_reflns               3993
_refine_ls_number_parameter
s           316
_refine_ls_goodness_of_fit_ref         1.055
_refine_ls_weig
hting_scheme            calc
_refine_ls_weighting_details

'w = 1/[\s^2^(Fo^2^) + (0.0809P)^2^+4.0909P] where P=(Fo^2^+2Fc^2^)/3'
_refi
ne_ls_shift/su_max                0.0020
_refine_ls_extinction_method
     SHELXL
_refine_ls_extinction_coef             0.0000
_refine_ls_extinctio
n_expression
   'Fc^*^=kFc[1+0.001xFc^2^\l^3^/sin(2\q)]^-1/4^'
_refine_diff_de
nsity_max               2.07
_refine_diff_density_min               -1.85
lo
op_
_atom_type_symbol
_atom_type_description
_atom_type_scat_dispersion_real

_atom_type_scat_dispersion_imag
_atom_type_scat_source
    'Ag' 'Ag'  -0.897
1.101
;International Tables for Crystallography
(1992, Vol. C, Tables 4.2.6
.8 and 6.1.1.4)
;
    'S' 'S'  0.125 0.123
;International Tables for Crystall
ography
(1992, Vol. C, Tables 4.2.6.8 and 6.1.1.4)
;
    'F' 'F'  0.017 0.010

;International Tables for Crystallography
(1992, Vol. C, Tables 4.2.6.8 and
6.1.1.4)
;
    'O' 'O'  0.011 0.006
;International Tables for Crystallography

(1992, Vol. C, Tables 4.2.6.8 and 6.1.1.4)
;
    'C' 'C'  0.003 0.002
;Inter
national Tables for Crystallography
(1992, Vol. C, Tables 4.2.6.8 and 6.1.1.
4)
;
    'H' 'H'  0.000 0.000
;International Tables for Crystallography
(1992
, Vol. C, Table 6.1.1.4)
;
#-------------------------------------------------------------------------
# ATOMIC COORDINATES AND DISPLACEMENT PARAMET
ERS
loop_
_atom_site_label
_atom_site_type_symbol
_atom_site_fract_x
_atom_
site_fract_y
_atom_site_fract_z
_atom_site_U_iso_or_equiv
_atom_site_adp_typ
e
_atom_site_occupancy
_atom_site_calc_flag
_atom_site_refinement_flags
_ato
m_site_disorder_assembly
_atom_site_disorder_group
   Ag(1)  Ag 1.12251(6)  0.
24051(5)  0.91964(5)  0.0531(2)   Uani 1.00 d . . .
   Ag(2)  Ag 1.66850(5)  0
.39905(5)  0.91156(6)  0.0532(2)   Uani 1.00 d . . .
   S(1)   S  1.0271(1)
0.3985(1)   1.1443(1)   0.0299(2)   Uani 1.00 d . . .
   S(2)   S  1.5010(2)
0.3821(2)   1.1404(2)   0.0508(4)   Uani 1.00 d . . .
   F(1)   F  0.8828(7)
0.2369(5)   1.2457(6)   0.097(2)    Uani 1.00 d . . .
   F(2)   F  1.1147(8)
0.2846(6)   1.3492(6)   0.097(2)    Uani 1.00 d . . .
   F(3)   F  1.0225(7)
0.4168(5)   1.3929(5)   0.082(2)    Uani 1.00 d . . .
   F(4)   F  1.546(2)
0.229(1)    1.300(2)    0.154(6)    Uani 0.60 d P . .
   F(5)   F  1.680(1)
0.387(1)    1.394(1)    0.223(7)    Uani 1.00 d . . .
   F(6)   F  1.591(3)
0.477(3)    1.390(2)    0.18(1)     Uani 0.40 d P . .
   F(7)   F  1.451(1)
0.324(1)    1.352(1)    0.208(6)    Uani 1.00 d . . .
   O(1)   O  0.9147(5)
0.4507(5)   1.1019(5)   0.053(1)    Uani 1.00 d . . .
   O(2)   O  0.9983(5)
0.2915(4)   1.0388(5)   0.0455(9)   Uani 1.00 d . . .
   O(3)   O  1.1738(5)
0.4913(4)   1.2079(5)   0.055(1)    Uani 1.00 d . . .
   O(4)   O  1.371(1)
0.329(2)    1.065(1)    0.31(1)     Uani 1.00 d . . .
   O(5)   O  1.6211(8)
0.421(1)    1.1169(8)   0.150(5)    Uani 1.00 d . . .
   O(6)   O  1.511(2)
0.513(1)    1.186(1)    0.169(5)    Uani 1.00 d . . .
   C(1)   C  1.0766(6)
0.3176(5)   0.7013(6)   0.035(1)    Uani 1.00 d . . .
   C(2)   C  1.1537(5)
0.2441(4)   0.6850(5)   0.0303(10)  Uani 1.00 d . . .
   C(3)   C  1.0783(5)
0.1203(4)   0.5924(5)   0.0231(8)   Uani 1.00 d . . .
   C(4)   C  1.1566(5)
0.0477(4)   0.5733(5)   0.0241(8)   Uani 1.00 d . . .
   C(5)   C  0.9208(5)
0.0737(4)   0.5196(5)   0.0234(8)   Uani 1.00 d . . .
   C(6)   C  0.8452(5)
0.1507(5)   0.5440(6)   0.032(1)    Uani 1.00 d . . .
   C(7)   C  0.9199(6)
0.2684(5)   0.6312(6)   0.037(1)    Uani 1.00 d . . .
   C(8)   C  1.3205(5)
0.0965(4)   0.6493(5)   0.0269(9)   Uani 1.00 d . . .
   C(9)   C  1.3923(6)
0.0549(6)   0.7678(7)   0.048(1)    Uani 1.00 d . . .
   C(10)  C  1.5443(7)
0.0975(8)   0.8354(8)   0.061(2)    Uani 1.00 d . . .
   C(11)  C  1.6282(6)
0.1826(7)   0.7862(8)   0.052(2)    Uani 1.00 d . . .
   C(12)  C  1.5583(6)
0.2260(7)   0.6704(8)   0.054(2)    Uani 1.00 d . . .
   C(13)  C  1.4044(6)
0.1831(6)   0.6019(7)   0.045(1)    Uani 1.00 d . . .
   C(14)  C  1.0114(9)
0.3306(6)   1.2917(8)   0.055(2)    Uani 1.00 d . . .
   C(15)  C  1.557(1)
0.354(2)    1.316(1)    0.111(5)    Uani 1.00 d . . .
   C(16)  C  1.125(2)
0.0334(10)  1.119(2)    0.111(5)    Uani 1.00 d . . .
   C(17)  C  1.125(1)
0.0229(9)   0.992(2)    0.097(4)    Uani 1.00 d . . .
   C(18)  C  1.003(3)
-0.0080(10) 0.875(1)    0.104(5)    Uani 1.00 d . . .
   H(1)   H  1.1283
0.4009      0.7593      0.0425      Uiso 1.00 calc . . .
   H(2)   H  1.2580
     0.2761      0.7360      0.0364      Uiso 1.00 calc . . .
   H(3)   H  0.740
7      0.1191      0.4983      0.0388      Uiso 1.00 calc . . .
   H(4)   H  0
.8671      0.3178      0.6453      0.0444      Uiso 1.00 calc . . .
   H(5)
H  1.3364      -0.0037     0.8030      0.0581      Uiso 1.00 calc . . .
   H(6
)   H  1.5916      0.0681      0.9168      0.0732      Uiso 1.00 calc . . .

H(7)   H  1.7325      0.2105      0.8318      0.0629      Uiso 1.00 calc . .
.
   H(8)   H  1.6148      0.2853      0.6364      0.0646      Uiso 1.00 calc
. . .
   H(9)   H  1.3572      0.2139      0.5220      0.0545      Uiso 1.00 c
alc . . .
   H(10)  H  1.2138      0.0586      1.2040      0.1332      Uiso 1.
00 calc . . .
   H(11)  H  1.2154      0.0379      0.9863      0.1167      Uis
o 1.00 calc . . .
   H(12)  H  1.0062      -0.0122     0.7851      0.1243
Uiso 1.00 calc . . .

loop_
_atom_site_aniso_label
_atom_site_aniso_U_11
_at
om_site_aniso_U_22
_atom_site_aniso_U_33
_atom_site_aniso_U_12
_atom_site_an
iso_U_13
_atom_site_aniso_U_23
   Ag(1)  0.0485(3)   0.0633(3)   0.0440(3)   0
.0153(2)   0.0233(2)   0.0002(2)
   Ag(2)  0.0424(3)   0.0588(3)   0.0516(3)
    0.0135(2)   0.0195(2)   0.0039(2)
   S(1)   0.0306(6)   0.0289(6)   0.0300
(6)   0.0098(5)   0.0145(5)   0.0049(4)
   S(2)   0.0335(7)   0.073(1)    0.
0488(8)   0.0196(7)   0.0186(6)   0.0232(8)
   F(1)   0.121(5)    0.061(3)
   0.102(4)    -0.012(3)   0.079(4)    0.017(3)
   F(2)   0.140(5)    0.097(4
)    0.073(3)    0.072(4)    0.036(3)    0.051(3)
   F(3)   0.138(5)    0.0
68(3)    0.055(3)    0.032(3)    0.062(3)    0.010(2)
   F(4)   0.20(1)
0.099(8)    0.14(1)     0.070(10)   0.03(1)     0.083(8)
   F(5)   0.132(8)
     0.29(2)     0.137(8)    0.037(9)    -0.034(7)   0.121(9)
   F(6)   0.15(
2)     0.25(3)     0.054(9)    0.02(2)     0.02(1)     -0.08(1)
   F(7)   0
.183(10)   0.33(2)     0.150(8)    0.07(1)     0.110(8)    0.16(1)
   O(1)
    0.054(3)    0.066(3)    0.046(2)    0.038(2)    0.018(2)    0.006(2)
   O
(2)   0.054(2)    0.037(2)    0.049(2)    0.017(2)    0.028(2)    -0.001(2)

   O(3)   0.040(2)    0.050(2)    0.054(3)    -0.006(2)   0.019(2)    0.007(2
)
   O(4)   0.073(6)    0.51(3)     0.125(8)    -0.11(1)    -0.038(6)   0.1
6(1)
   O(5)   0.063(4)    0.28(1)     0.071(5)    0.005(6)    0.040(4)
0.021(6)
   O(6)   0.20(1)     0.123(8)    0.16(1)     0.084(9)    0.046(9)
     0.038(8)
   C(1)   0.037(3)    0.025(2)    0.038(3)    0.007(2)    0.015
(2)    -0.003(2)
   C(2)   0.025(2)    0.025(2)    0.033(2)    0.002(2)    0
.011(2)    -0.002(2)
   C(3)   0.022(2)    0.021(2)    0.023(2)    0.004(2)
    0.010(2)    0.003(2)
   C(4)   0.019(2)    0.023(2)    0.025(2)    0.003(
2)    0.008(2)    0.003(2)
   C(5)   0.020(2)    0.025(2)    0.024(2)    0.
006(2)    0.010(2)    0.004(2)
   C(6)   0.024(2)    0.036(2)    0.035(2)
   0.012(2)    0.011(2)    0.002(2)
   C(7)   0.035(3)    0.033(3)    0.045(3
)    0.016(2)    0.020(2)    0.001(2)
   C(8)   0.018(2)    0.026(2)    0.0
30(2)    0.006(2)    0.008(2)    0.000(2)
   C(9)   0.031(3)    0.059(4)
0.049(3)    0.013(3)    0.012(2)    0.023(3)
   C(10)  0.035(3)    0.081(5)
     0.051(4)    0.025(3)    0.000(3)    0.016(4)
   C(11)  0.019(2)    0.060
(4)    0.058(4)    0.008(2)    0.007(2)    -0.010(3)
   C(12)  0.025(3)    0
.059(4)    0.065(4)    -0.001(3)   0.022(3)    0.007(3)
   C(13)  0.027(3)
    0.054(3)    0.044(3)    0.005(2)    0.013(2)    0.014(3)
   C(14)  0.079(
5)    0.040(3)    0.050(4)    0.015(3)    0.037(4)    0.013(3)
   C(15)  0.
073(7)    0.17(1)     0.067(6)    0.023(7)    0.020(5)    0.061(8)
   C(16)
   0.100(9)    0.053(5)    0.107(9)    0.028(6)    -0.023(7)   0.001(6)
   C(
17)  0.084(7)    0.048(5)    0.20(1)     0.028(5)    0.097(9)    0.037(7)

   C(18)  0.24(2)     0.049(5)    0.083(7)    0.068(8)    0.11(1)     0.036(5
)
#----------------------------------------------------------------------
_computing_data_collection            'MSC/AFC Diffractometer Contr
ol'
_computing_cell_refinement            'MSC/AFC Diffractometer Control'
_
computing_data_reduction             'teXsan Ver. 1.11'
_computing_structure
_solution          SIR88
_computing_structure_refinement       'SHELXL97'
_c
omputing_publication_material       'teXsan Ver. 1.11'
_computing_molecular_
graphics          ?
#-------------------------------------------------------
_geom_special_details
;
   ?
;
loop_
_geom_bond_atom_s
ite_label_1
_geom_bond_atom_site_label_2
_geom_bond_distance
_geom_bond_site
_symmetry_1
_geom_bond_site_symmetry_2
_geom_bond_publ_flag
   Ag(1)     O(2)
      2.294(6)   . . yes
   Ag(1)     O(4)      2.296(9)   . . yes
   Ag(1)     C(
1)      2.435(6)   . . yes
   Ag(2)     O(1)      2.436(4)   . 1_655 yes
   Ag(2
)     O(3)      2.553(6)   . 2_867 yes
   Ag(2)     O(5)      2.39(1)    . . y
es
   Ag(2)     O(6)      2.36(2)    . 2_867 yes
   Ag(2)     C(11)     2.537(8)
    . . yes
   Ag(2)     C(12)     2.664(7)   . . yes
   S(1)      O(1)      1.433
(6)   . . yes
   S(1)      O(2)      1.448(5)   . . yes
   S(1)      O(3)      1
.434(4)   . . yes
   S(1)      C(14)     1.820(9)   . . yes
   S(2)      O(4)
    1.206(9)   . . yes
   S(2)      O(5)      1.341(10)  . . yes
   S(2)      O(6)
       1.49(1)    . . yes
   S(2)      C(15)     1.78(1)    . . yes
   F(1)      C
(14)     1.323(9)   . . yes
   F(2)      C(14)     1.32(1)    . . yes
   F(3)
    C(14)     1.33(1)    . . yes
   F(4)      C(15)     1.40(2)    . . yes
   F(5)
       C(15)     1.16(1)    . . yes
   F(6)      C(15)     1.41(4)    . . yes
   F
(7)      C(15)     1.28(2)    . . yes
   C(1)      C(2)      1.386(9)   . . ye
s
   C(1)      C(7)      1.424(8)   . . yes
   C(1)      H(1)      0.951      .
. no
   C(2)      C(3)      1.437(6)   . . yes
   C(2)      H(2)      0.951
. . no
   C(3)      C(4)      1.399(8)   . . yes
   C(3)      C(5)      1.433(6)
    . . yes
   C(4)      C(5)      1.417(6)   . 2_756 yes
   C(4)      C(8)      1
.490(6)   . . yes
   C(5)      C(6)      1.432(9)   . . yes
   C(6)      C(7)
    1.362(7)   . . yes
   C(6)      H(3)      0.950      . . no
   C(7)      H(4)
      0.951      . . no
   C(8)      C(9)      1.386(9)   . . yes
   C(8)      C(1
3)     1.379(9)   . . yes
   C(9)      C(10)     1.383(9)   . . yes
   C(9)
H(5)      0.950      . . no
   C(10)     C(11)     1.38(1)    . . yes
   C(10)
    H(6)      0.952      . . no
   C(11)     C(12)     1.37(1)    . . yes
   C(11)
      H(7)      0.950      . . no
   C(12)     C(13)     1.401(8)   . . yes
   C(1
2)     H(8)      0.950      . . no
   C(13)     H(9)      0.950      . . no
   C
(16)     C(17)     1.32(3)    . . yes
   C(16)     C(18)     1.32(3)    . 2_75
7 yes
   C(16)     H(10)     0.950      . . no
   C(17)     C(18)     1.31(2)
. . yes
   C(17)     H(11)     0.950      . . no
   C(18)     H(12)     0.950
    . . no
#------------------------------------------------------------------
loop_
_geom_angle_atom_site_label_1
_geom_angle_atom_site_label
_2
_geom_angle_atom_site_label_3
_geom_angle
_geom_angle_site_symmetry_1
_ge
om_angle_site_symmetry_2
_geom_angle_site_symmetry_3
_geom_angle_publ_flag

   O(2)      Ag(1)     O(4)      109.2(4)   . . . yes
     O(2)      Ag(1)     C
(1)      112.5(2)   . . . yes
     O(4)      Ag(1)     C(1)      107.7(4)   .
. . yes
     O(1)      Ag(2)     O(3)      79.2(2)    1_655 . 2_867 yes
     O(1
)      Ag(2)     O(5)      79.8(2)    1_655 . . yes
     O(1)      Ag(2)     O
(6)      141.3(3)   1_655 . 2_867 yes
     O(1)      Ag(2)     C(11)     99.1(
2)    1_655 . . yes
     O(1)      Ag(2)     C(12)     122.6(2)   1_655 . . ye
s
     O(3)      Ag(2)     O(5)      144.3(3)   2_867 . . yes
     O(3)      Ag(
2)     O(6)      94.6(4)    2_867 . 2_867 yes
     O(3)      Ag(2)     C(11)
    92.1(2)    2_867 . . yes
     O(3)      Ag(2)     C(12)     79.1(2)    2_867
. . yes
     O(5)      Ag(2)     O(6)      84.2(5)    . . 2_867 yes
     O(5)
    Ag(2)     C(11)     119.6(4)   . . . yes
     O(5)      Ag(2)     C(12)
136.6(3)   . . . yes
     O(6)      Ag(2)     C(11)     119.4(3)   2_867 . . y
es
     O(6)      Ag(2)     C(12)     92.8(3)    2_867 . . yes
     C(11)     Ag
(2)     C(12)     30.5(2)    . . . yes
     O(1)      S(1)      O(2)      113.
7(3)   . . . yes
     O(1)      S(1)      O(3)      113.8(3)   . . . yes
     O(
1)      S(1)      C(14)     103.8(4)   . . . yes
     O(2)      S(1)      O(3)
       116.1(3)   . . . yes
     O(2)      S(1)      C(14)     103.7(3)   . . .
yes
     O(3)      S(1)      C(14)     103.8(3)   . . . yes
     O(4)      S(2)
      O(5)      134.7(8)   . . . yes
     O(4)      S(2)      O(6)      101(1)
    . . . yes
     O(4)      S(2)      C(15)     113.4(9)   . . . yes
     O(5)
    S(2)      O(6)      93.7(9)    . . . yes
     O(5)      S(2)      C(15)
107.5(6)   . . . yes
     O(6)      S(2)      C(15)     94.2(8)    . . . yes

   Ag(2)     O(1)      S(1)      138.4(3)   1_455 . . yes
     Ag(1)     O(2)
    S(1)      135.4(3)   . . . yes
     Ag(2)     O(3)      S(1)      129.6(3)
2_867 . . yes
     Ag(1)     O(4)      S(2)      176(1)     . . . yes
     Ag(2)
      O(5)      S(2)      135.0(4)   . . . yes
     Ag(2)     O(6)      S(2)
   127.7(6)   2_867 . . yes
     Ag(1)     C(1)      C(2)      80.5(3)    . . .
yes
     Ag(1)     C(1)      C(7)      101.3(4)   . . . yes
     Ag(1)     C(1)
      H(1)      88.3       . . . no
     C(2)      C(1)      C(7)      120.0(4)
   . . . yes
     C(2)      C(1)      H(1)      120.0      . . . no
     C(7)
C(1)      H(1)      120.0      . . . no
     C(1)      C(2)      C(3)      121
.0(4)   . . . yes
     C(1)      C(2)      H(2)      119.5      . . . no
     C(
3)      C(2)      H(2)      119.5      . . . no
     C(2)      C(3)      C(4)
      120.9(4)   . . . yes
     C(2)      C(3)      C(5)      118.1(5)   . . . y
es
     C(4)      C(3)      C(5)      121.0(4)   . . . yes
     C(3)      C(4)
     C(5)      119.5(4)   . . 2_756 yes
     C(3)      C(4)      C(8)      120.8
(4)   . . . yes
     C(5)      C(4)      C(8)      119.7(5)   2_756 . . yes

C(3)      C(5)      C(4)      119.4(5)   . . 2_756 yes
     C(3)      C(5)
   C(6)      119.0(4)   . . . yes
     C(4)      C(5)      C(6)      121.5(4)
2_756 . . yes
     C(5)      C(6)      C(7)      121.5(5)   . . . yes
     C(5)
      C(6)      H(3)      119.3      . . . no
     C(7)      C(6)      H(3)
119.3      . . . no
     C(1)      C(7)      C(6)      120.3(6)   . . . yes

C(1)      C(7)      H(4)      119.9      . . . no
     C(6)      C(7)      H(4
)      119.9      . . . no
     C(4)      C(8)      C(9)      121.0(5)   . . .
yes
     C(4)      C(8)      C(13)     120.6(5)   . . . yes
     C(9)      C(8)
      C(13)     118.4(5)   . . . yes
     C(8)      C(9)      C(10)     120.8(7)
    . . . yes
     C(8)      C(9)      H(5)      119.6      . . . no
     C(10)
   C(9)      H(5)      119.6      . . . no
     C(9)      C(10)     C(11)     12
0.7(7)   . . . yes
     C(9)      C(10)     H(6)      119.6      . . . no
     C
(11)     C(10)     H(6)      119.7      . . . no
     Ag(2)     C(11)     C(10
)     105.8(6)   . . . yes
     Ag(2)     C(11)     C(12)     79.9(5)    . . .
yes
     Ag(2)     C(11)     H(7)      84.6       . . . no
     C(10)     C(11)
     C(12)     118.9(6)   . . . yes
     C(10)     C(11)     H(7)      120.5
   . . . no
     C(12)     C(11)     H(7)      120.5      . . . no
     Ag(2)
C(12)     C(11)     69.6(4)    . . . yes
     Ag(2)     C(12)     C(13)     11
1.4(6)   . . . yes
     Ag(2)     C(12)     H(8)      89.0       . . . no
     C
(11)     C(12)     C(13)     120.4(7)   . . . yes
     C(11)     C(12)     H(8
)      119.7      . . . no
     C(13)     C(12)     H(8)      119.8      . . .
no
     C(8)      C(13)     C(12)     120.7(6)   . . . yes
     C(8)      C(13)
     H(9)      119.6      . . . no
     C(12)     C(13)     H(9)      119.7
. . . no
     S(1)      C(14)     F(1)      110.3(5)   . . . yes
     S(1)
C(14)     F(2)      111.3(7)   . . . yes
     S(1)      C(14)     F(3)      11
0.6(5)   . . . yes
     F(1)      C(14)     F(2)      107.4(6)   . . . yes

F(1)      C(14)     F(3)      108.6(9)   . . . yes
     F(2)      C(14)     F(
3)      108.5(6)   . . . yes
     S(2)      C(15)     F(4)      105.7(10)  . .
. yes
     S(2)      C(15)     F(5)      120(1)     . . . yes
     S(2)      C(1
5)     F(6)      97(1)      . . . yes
     S(2)      C(15)     F(7)      112.4
(9)   . . . yes
     F(4)      C(15)     F(5)      90(1)      . . . yes
     F(4
)      C(15)     F(6)      156(1)     . . . yes
     F(4)      C(15)     F(7)
      88(1)      . . . yes
     F(5)      C(15)     F(6)      75(1)      . . . y
es
     F(5)      C(15)     F(7)      124(1)     . . . yes
     F(6)      C(15)
     F(7)      84(1)      . . . yes
     C(17)     C(16)     C(18)     118(1)
   . . 2_757 yes
     C(17)     C(16)     H(10)     120.8      . . . no
     C(18)
      C(16)     H(10)     120.7      2_757 . . no
     C(16)     C(17)     C(18)
      121(1)     . . . yes
     C(16)     C(17)     H(11)     119.4      . . . n
o
     C(18)     C(17)     H(11)     119.5      . . . no
     C(16)     C(18)
   C(17)     120(1)     2_757 . . yes
     C(16)     C(18)     H(12)     119.9
     2_757 . . no
     C(17)     C(18)     H(12)     119.7      . . . no
     O(2)
       Ag(1)     O(4)      109.2(4)   . . . yes
     O(2)      Ag(1)     C(1)
    112.5(2)   . . . yes
     O(2)      Ag(1)     C(2)      143.8(2)   . . . yes

     O(2)      Ag(1)     C(18)     97.7(6)    . . . yes
     O(2)      Ag(1)
   C(17)     99.2(5)    . . . yes
     O(4)      Ag(1)     C(1)      107.7(4)
. . . yes
     O(4)      Ag(1)     C(2)      94.0(4)    . . . yes
     O(4)
Ag(1)     C(18)     115.5(7)   . . . yes
     O(4)      Ag(1)     C(17)     88
.6(6)    . . . yes
     C(1)      Ag(1)     C(2)      31.8(2)    . . . yes

C(1)      Ag(1)     C(18)     114.1(3)   . . . yes
     C(1)      Ag(1)     C(
17)     136.0(5)   . . . yes
     C(2)      Ag(1)     C(18)     96.8(4)    . .
. yes
     C(2)      Ag(1)     C(17)     109.1(5)   . . . yes
     C(18)     Ag(
1)     C(17)     28.4(5)    . . . yes
     O(6)      Ag(2)     O(5)      84.2(
5)    2_867 . . yes
     O(6)      Ag(2)     O(1)      141.3(3)   2_867 . 1_65
5 yes
     O(6)      Ag(2)     C(11)     119.4(3)   2_867 . . yes
     O(6)
Ag(2)     O(3)      94.6(4)    2_867 . 2_867 yes
     O(6)      Ag(2)     C(12
)     92.8(3)    2_867 . . yes
     O(5)      Ag(2)     O(1)      79.8(2)    .
. 1_655 yes
     O(5)      Ag(2)     C(11)     119.6(4)   . . . yes
     O(5)
    Ag(2)     O(3)      144.3(3)   . . 2_867 yes
     O(5)      Ag(2)     C(12)
     136.6(3)   . . . yes
     O(1)      Ag(2)     C(11)     99.1(2)    1_655 .
. yes
     O(1)      Ag(2)     O(3)      79.2(2)    1_655 . 2_867 yes
     O(1)
      Ag(2)     C(12)     122.6(2)   1_655 . . yes
     C(11)     Ag(2)     O(3)
       92.1(2)    . . 2_867 yes
     C(11)     Ag(2)     C(12)     30.5(2)    .
. . yes
     O(3)      Ag(2)     C(12)     79.1(2)    2_867 . . yes
#------------------------------------------------------------------------
loop_

_geom_contact_atom_site_label_1
_geom_contact_atom_site_label_2
_geom_contac
t_distance
_geom_contact_site_symmetry_1
_geom_contact_site_symmetry_2
_geom
_contact_publ_flag
   Ag(2)     O(3)      2.553(6)   . 2_867 ?
   Ag(2)     C(11
)     2.537(8)   . . ?
   Ag(2)     C(12)     2.664(7)   . . ?
   S(1)      O(1)
       3.355(6)   . 2_767 ?
   F(1)      C(6)      3.469(10)  . 1_556 ?
   F(1)
    C(5)      3.501(8)   . 1_556 ?
   F(2)      C(3)      3.350(8)   . 1_556 ?

F(2)      F(6)      3.39(2)    . 2_868 ?
   F(2)      C(2)      3.450(9)   . 1
_556 ?
   F(3)      F(5)      3.05(1)    . 2_868 ?
   F(3)      F(3)      3.09(1
)    . 2_768 ?
   F(3)      C(1)      3.395(8)   . 1_556 ?
   F(3)      C(7)
   3.452(9)   . 1_556 ?
   F(3)      C(7)      3.521(8)   . 2_767 ?
   F(3)      F
(5)      3.55(2)    . 1_455 ?
   F(3)      F(6)      3.56(2)    . 2_868 ?
   F(4
)      C(10)     3.58(2)    . 2_857 ?
   F(4)      C(9)      3.58(2)    . 2_85
7 ?
   F(5)      C(7)      3.50(2)    . 1_656 ?
   F(7)      C(13)     3.29(2)
   . 1_556 ?
   F(7)      C(12)     3.47(2)    . 1_556 ?
   O(1)      O(5)      3.
10(1)    . 1_455 ?
   O(1)      C(1)      3.178(8)   . 2_767 ?
   O(1)      O(3)
       3.182(7)   . 2_767 ?
   O(1)      O(1)      3.35(1)    . 2_767 ?
   O(1)
    O(2)      3.440(7)   . 2_767 ?
   O(1)      C(7)      3.529(7)   . 2_767 ?

O(2)      C(11)     3.510(7)   . 1_455 ?
   Ag(1)     C(2)      2.595(6)   . .
?
   Ag(1)     C(18)     2.65(1)    . . ?
   Ag(1)     C(17)     2.67(1)    . .
?
   Ag(2)     C(11)     2.537(8)   . . ?
   Ag(2)     O(3)      2.553(6)   . 2_
867 ?
   Ag(2)     C(12)     2.664(7)   . . ?
#===END

data_General
_audit_creation_date                  'Tue May  7 14:46:38 200
2'
_audit_creation_method                'by teXsan'
_audit_update_record
                 ?
#----------------------------------------------------------
# PROCESSING SUMMARY (IUCr Office Use Only)
_journal_d
ate_recd_electronic          ?
_journal_date_from_coeditor            ?
_jou
rnal_date_accepted                 ?
_journal_coeditor_code
?
#-------------------------------------------------------------------------
# SUBMISSION DETAILS
_publ_contact_author_name             ' ENTER NA
ME'
_publ_contact_author_address
;
      ENTER ADDRESS
;
_publ_contact_author_
email            ' ENTER EMAIL ADDRESS '
_publ_contact_author_fax
    ' ENTER FAX NUMBER '
_publ_contact_author_phone            ' ENTER PHONE N
UMBER '
_publ_contact_letter
;
      ENTER TEXT OF LETTER
;
_publ_requested_jo
urnal               ' ENTER JOURNAL NAME HERE'
_publ_requested_category
          ' FM'

_publ_requested_coeditor_name          ?
#-----------------------------------------------------------------------
# TITLE AND AUTH
OR LIST

_publ_section_title
;
      ENTER SECTION TITLE
;

_publ_section_tit
le_footnote
;
      ENTER FOOTNOTE TO TITLE OF PAPER
;
loop_
_publ_author_name

_publ_author_footnote
_publ_author_address
' FIRST AUTHORS NAME '
;
    FIRST
AUTHORS FOOTNOTES
;
;
    FIRST AUTHORS ADDRESS
;
_publ_section_synopsis
;
    E
NTER SYNOPSIS
;
#-----------------------------------------------------------
# TEXT

_publ_section_abstract
;
      ENTER ABSTRACT
;


_publ_section_comment
;
      ENTER TEXT
;

_publ_section_acknowledgements
;

    ENTER ACKNOWLEDGEMENTS
;

_publ_section_references
;
      ENTER OTHER REFER
ENCES
Molecular Structure Corporation, Rigaku Corporation. (2000). teXsan.

Single Crystal Structure Analysis Software. Version 1.11.
MSC, 3200 Research
Forest Drive, The Woodlands, TX 77381, USA.
Rigaku, 3-9-12 Akishima, Tokyo,
Japan.
;

_publ_section_figure_captions
;
      ENTER FIGURE CAPTIONS
;

_publ
_section_exptl_prep
;
      ENTER COMPOUND PREPARATION DETAILS
;

_publ_sectio
n_exptl_refinement
;
      ENTER SPECIAL DETAILS OF THE REFINEMENT
;
#-----------------------------------------------------------------------
data_
[Ag2(dmban)2(ClO4)2(p-xyle
#-----------------------------------------------------------------------
# CHEMICAL DATA
_chemical_formula_sum
            'C48 H42 Ag2 Cl2 O8 '
_chemical_formula_moiety               'C48
H42 Ag2 Cl2 O8 '
_chemical_formula_weight               1033.50
_chemical_me
lting_point                ?
#-----------------------------------------------------------------------
# CRYSTAL DATA
_symmetry_cell_setting
             monoclinic
_symmetry_space_group_name_H-M        'C 1 2/c 1'
_sym
metry_space_group_name_Hall        '-C 2yc'
_symmetry_Int_Tables_number
        15
loop_
_symmetry_equiv_pos_as_xyz
x,y,z
-x,y,1/2-z
-x,-y,-z
x,-y,1/2
+z
1/2+x,1/2+y,z
1/2-x,1/2+y,1/2-z
1/2-x,1/2-y,-z
1/2+x,1/2-y,1/2+z
_cell_le
ngth_a                         7.504(2)
_cell_length_b
    23.858(8)
_cell_length_c                         23.062(1)
_cell_angle_alp
ha                      90
_cell_angle_beta                       89.238(1)

_cell_angle_gamma                      90
_cell_volume
      4128(1)
_cell_formula_units_Z                  4
_cell_measurement_refln
s_used          ?
_cell_measurement_theta_min            ?
_cell_measurement
_theta_max            ?
_cell_measurement_temperature          295.2
#----------------------------------------------------------------------
_ex
ptl_crystal_description            'platelet'
_exptl_crystal_colour
         'yellow'
_exptl_crystal_size_max                0.200
_exptl_crystal_
size_mid                0.200
_exptl_crystal_size_min                0.200
_
exptl_crystal_size_rad                ?
_exptl_crystal_density_diffrn
    1.663
_exptl_crystal_density_meas            ?
_exptl_crystal_density_meth
od         'not measured'
_exptl_crystal_F_000                  '2088.0'
_ex
ptl_absorpt_coefficient_mu          1.132
_exptl_absorpt_correction_type
      none
#------------------------------------------------------------------
# EXPERIMENTAL DATA
_diffrn_radiation_type                'Mo
K\a'
_diffrn_radiation_wavelength           0.7107
_diffrn_measurement_devic
e_type       'Quantum CCD/Rigaku AFC7'
_diffrn_measurement_method
   \w
_diffrn_detector_area_resol_mean       ?
_diffrn_reflns_number
         4854
_diffrn_reflns_av_R_equivalents        0.000
_diffrn_reflns_thet
a_min               ?
_diffrn_reflns_theta_max               28.17
_diffrn_r
eflns_theta_full              28.17
_diffrn_measured_fraction_theta_max    1
.00
_diffrn_measured_fraction_theta_full   1.00
_diffrn_reflns_limit_h_min
            0
_diffrn_reflns_limit_h_max             9
_diffrn_reflns_limit_k_
min             0
_diffrn_reflns_limit_k_max             31
_diffrn_reflns_l
imit_l_min             -29
_diffrn_reflns_limit_l_max             29
#----------------------------------------------------------------------
# R
EFINEMENT DATA
_refine_special_details
;
Refinement using reflections with
F^2^ > -10.0 sigma(F^2^). The weighted
R-factor (wR) and goodness of fit (S
) are based on F^2^. R-factor (gt) are
based on F. The threshold expression
of F^2^ > 2.0 sigma(F^2^) is used only
for calculating R-factor (gt).
;
_re
flns_number_total                   4747
_reflns_number_gt
     3194
_reflns_threshold_expression                >2.0sigma(I)
_refine_ls_
structure_factor_coef            Fsqd
_refine_ls_R_factor_gt
0.1086
_refine_ls_wR_factor_ref               0.4132
_refine_ls_hydrogen_tre
atment          noref
_refine_ls_number_reflns               3194
_refine_ls
_number_parameters           272
_refine_ls_goodness_of_fit_ref         1.72
5
_refine_ls_weighting_scheme            calc
_refine_ls_weighting_details

     'w = 1/[\s^2^(Fo^2^) + (0.2000P)^2^+0.0000P] where P=(Fo^2^+
2Fc^2^)/3'
_refine_ls_shift/su_max                0.0000
_refine_ls_extincti
on_method           SHELXL
_refine_ls_extinction_coef             0.0000
_re
fine_ls_extinction_expression
   'Fc^*^=kFc[1+0.001xFc^2^\l^3^/sin(2\q)]^-1/4^
'
_refine_diff_density_max               1.25
_refine_diff_density_min
          -3.42
loop_
_atom_type_symbol
_atom_type_description
_atom_type_scat
_dispersion_real
_atom_type_scat_dispersion_imag
_atom_type_scat_source
    'A
g' 'Ag'  -0.897 1.101
;International Tables for Crystallography
(1992, Vol.
C, Tables 4.2.6.8 and 6.1.1.4)
;
    'Cl' 'Cl'  0.148 0.159
;International Ta
bles for Crystallography
(1992, Vol. C, Tables 4.2.6.8 and 6.1.1.4)
;
    'O'
'O'  0.011 0.006
;International Tables for Crystallography
(1992, Vol. C, T
ables 4.2.6.8 and 6.1.1.4)
;
    'C' 'C'  0.003 0.002
;International Tables f
or Crystallography
(1992, Vol. C, Tables 4.2.6.8 and 6.1.1.4)
;
    'H' 'H'  0
.000 0.000
;International Tables for Crystallography
(1992, Vol. C, Table 6
.1.1.4)
;
#-----------------------------------------------------------------
# ATOMIC COORDINATES AND DISPLACEMENT PARAMETERS
loop_
_atom_
site_label
_atom_site_type_symbol
_atom_site_fract_x
_atom_site_fract_y
_ato
m_site_fract_z
_atom_site_U_iso_or_equiv
_atom_site_adp_type
_atom_site_occu
pancy
_atom_site_calc_flag
_atom_site_refinement_flags
_atom_site_disorder_a
ssembly
_atom_site_disorder_group
   Ag(1)  Ag 0.5000      0.00139(4)  0.7500
      0.0651(4)   Uani 1.00 d S . .
   Ag(2)  Ag 0.0000      0.33411(4)  0.7500
      0.0685(4)   Uani 1.00 d S . .
   Cl(1)  Cl 0.2993(4)   -0.08095(9) 0.8570(
1)   0.0684(7)   Uani 1.00 d . . .
   O(1)   O  0.435(2)    -0.0814(3)  0.8123
(4)   0.093(3)    Uani 1.00 d . . .
   O(2)   O  0.132(2)    -0.0849(4)  0.826
9(6)   0.122(4)    Uani 1.00 d . . .
   O(3)   O  0.307(2)    -0.0301(4)  0.88
75(4)   0.105(3)    Uani 1.00 d . . .
   O(4)   O  0.321(2)    -0.1276(4)  0.8
926(4)   0.124(4)    Uani 1.00 d . . .
   C(1)   C  0.323(2)    0.1100(5)   0.
5867(4)   0.076(3)    Uani 1.00 d . . .
   C(2)   C  0.324(2)    0.0741(6)   0
.5416(6)   0.095(4)    Uani 1.00 d . . .
   C(3)   C  0.266(2)    0.0189(6)
0.5482(6)   0.099(4)    Uani 1.00 d . . .
   C(4)   C  0.226(2)    -0.0005(5)
0.6036(6)   0.092(4)    Uani 1.00 d . . .
   C(5)   C  0.229(1)    0.0366(4)
0.6517(4)   0.063(2)    Uani 1.00 d . . .
   C(6)   C  0.204(1)    0.0160(4)
0.7103(5)   0.068(2)    Uani 1.00 d . . .
   C(7)   C  0.214(1)    0.0507(4)
0.7562(4)   0.061(2)    Uani 1.00 d . . .
   C(8)   C  0.244(1)    0.1099(4)
0.7490(4)   0.054(2)    Uani 1.00 d . . .
   C(9)   C  0.245(1)    0.1445(4)
0.8004(4)   0.060(2)    Uani 1.00 d . . .
   C(10)  C  0.262(1)    0.2028(4)
0.7926(3)   0.054(2)    Uani 1.00 d . . .
   C(11)  C  0.279(1)    0.2393(5)
0.8414(4)   0.072(2)    Uani 1.00 d . . .
   C(12)  C  0.291(1)    0.2959(4)
0.8357(4)   0.068(2)    Uani 1.00 d . . .
   C(13)  C  0.294(1)    0.3191(4)
0.7782(5)   0.062(2)    Uani 1.00 d . . .
   C(14)  C  0.2819(10)  0.2855(4)
0.7303(4)   0.055(2)    Uani 1.00 d . . .
   C(15)  C  0.2590(10)  0.2261(4)
0.7367(4)   0.054(2)    Uani 1.00 d . . .
   C(16)  C  0.245(1)    0.1916(4)
0.6862(4)   0.060(2)    Uani 1.00 d . . .
   C(17)  C  0.256(1)    0.1343(4)
0.6935(4)   0.055(2)    Uani 1.00 d . . .
   C(18)  C  0.270(1)    0.0944(4)
0.6425(4)   0.057(2)    Uani 1.00 d . . .
   C(19)  C  0.233(2)    0.1177(5)
0.8588(4)   0.075(3)    Uani 1.00 d . . .
   C(20)  C  0.203(1)    0.2225(4)
0.6303(4)   0.066(2)    Uani 1.00 d . . .
   C(21)  C  0.132(4)    0.289(1)
0.9903(6)   0.122(6)    Uani 1.00 d . . .
   C(22)  C  0.298(4)    0.3066(7)
0.9907(5)   0.124(7)    Uani 1.00 d . . .
   C(23)  C  0.423(2)    0.266(1)
1.0000(6)   0.121(6)    Uani 1.00 d . . .
   C(24)  C  0.348(5)    0.3649(9)
0.9791(8)   0.25(2)     Uani 1.00 d . . .
   H(1)   H  0.3591      0.1476
0.5801      0.0911      Uiso 1.00 calc . . .
   H(3)   H  0.2549      -0.0050
     0.5155      0.1183      Uiso 1.00 calc . . .
   H(4)   H  0.1958      -0.03
88     0.6093      0.1099      Uiso 1.00 calc . . .
   H(5)   H  0.1805      -
0.0226     0.7164      0.0810      Uiso 1.00 calc . . .
   H(6)   H  0.2009
    0.0358      0.7941      0.0728      Uiso 1.00 calc . . .
   H(7)   H  0.2810
       0.2235      0.8791      0.0860      Uiso 1.00 calc . . .
   H(8)   H  0.2
979      0.3194      0.8688      0.0816      Uiso 1.00 calc . . .
   H(9)   H
0.3047      0.3585      0.7734      0.0741      Uiso 1.00 calc . . .
   H(10)
H  0.2886      0.3016      0.6926      0.0658      Uiso 1.00 calc . . .
   H(1
1)  H  0.2352      0.1459      0.8879      0.0904      Uiso 1.00 calc . . .

H(12)  H  0.1247      0.0972      0.8620      0.0904      Uiso 1.00 calc . .
.
   H(13)  H  0.3308      0.0930      0.8637      0.0904      Uiso 1.00 calc
. . .
   H(14)  H  0.3648      0.0867      0.5046      0.1142      Uiso 1.00 c
alc . . .
   H(15)  H  0.2949      0.2489      0.6222      0.0793      Uiso 1.
00 calc . . .
   H(16)  H  0.1963      0.1964      0.5993      0.0793      Uis
o 1.00 calc . . .
   H(17)  H  0.0926      0.2415      0.6346      0.0793
Uiso 1.00 calc . . .
   H(18)  H  0.0423      0.3157      0.9827      0.1461
     Uiso 1.00 calc . . .
   H(19)  H  0.5468      0.2749      0.9998      0.144
6      Uiso 1.00 calc . . .
   H(20)  H  0.4742      0.3686      0.9814      0
.3029      Uiso 1.00 calc . . .
   H(21)  H  0.3109      0.3751      0.9414
    0.3029      Uiso 1.00 calc . . .
   H(22)  H  0.2927      0.3886      1.0070
       0.3029      Uiso 1.00 calc . . .

loop_
_atom_site_aniso_label
_atom_si
te_aniso_U_11
_atom_site_aniso_U_22
_atom_site_aniso_U_33
_atom_site_aniso_U
_12
_atom_site_aniso_U_13
_atom_site_aniso_U_23
   Ag(1)  0.0640(7)   0.0535(6
)   0.0776(8)   0.0000      0.0073(5)   0.0000
   Ag(2)  0.0616(7)   0.05
83(7)   0.0855(8)   0.0000      0.0109(5)   0.0000
   Cl(1)  0.098(2)
0.054(1)    0.053(1)    0.0041(10)  0.018(1)    0.0010(9)
   O(1)   0.122(8)
     0.066(5)    0.089(6)    -0.002(4)   0.036(5)    -0.002(4)
   O(2)   0.104
(8)    0.125(9)    0.14(1)     0.009(5)    0.002(7)    -0.028(6)
   O(3)   0
.164(9)    0.074(5)    0.075(5)    0.019(5)    0.019(5)    -0.021(4)
   O(4)
    0.22(1)     0.083(6)    0.073(5)    0.015(7)    0.025(7)    0.021(5)
   C
(1)   0.097(7)    0.070(6)    0.060(6)    -0.006(5)   0.018(5)    -0.007(5)

   C(2)   0.13(1)     0.094(9)    0.061(6)    0.004(7)    0.017(7)    -0.015(
6)
   C(3)   0.13(1)     0.091(8)    0.075(7)    -0.018(8)   0.007(7)    -0.
035(7)
   C(4)   0.097(8)    0.101(9)    0.076(7)    -0.012(6)   0.007(6)
-0.029(6)
   C(5)   0.063(5)    0.064(5)    0.064(5)    0.003(4)    -0.009(4
)   -0.006(4)
   C(6)   0.066(5)    0.053(5)    0.083(7)    -0.001(4)   -0.0
03(4)   0.001(5)
   C(7)   0.056(5)    0.053(4)    0.073(5)    0.009(3)
0.004(4)    0.012(4)
   C(8)   0.045(4)    0.063(5)    0.055(4)    -0.003(3
)   -0.003(3)   -0.001(4)
   C(9)   0.060(5)    0.058(5)    0.063(5)    0.00
2(4)    0.010(4)    -0.007(4)
   C(10)  0.061(4)    0.055(4)    0.045(4)
0.008(3)    0.010(3)    -0.004(3)
   C(11)  0.087(6)    0.078(6)    0.049(5)
     -0.003(5)   0.011(4)    -0.010(4)
   C(12)  0.084(6)    0.069(6)    0.052
(5)    -0.001(5)   0.003(4)    -0.010(4)
   C(13)  0.058(4)    0.049(4)    0
.078(6)    -0.005(4)   0.002(4)    -0.013(4)
   C(14)  0.041(3)    0.067(5)
    0.056(4)    0.008(3)    0.007(3)    0.007(4)
   C(15)  0.037(3)    0.066(
5)    0.058(4)    0.005(3)    0.006(3)    -0.006(4)
   C(16)  0.066(5)    0.
063(5)    0.049(4)    -0.004(4)   0.014(3)    0.000(4)
   C(17)  0.058(4)
   0.058(5)    0.048(4)    0.005(3)    0.006(3)    0.000(3)
   C(18)  0.047(4
)    0.067(5)    0.055(5)    0.007(4)    -0.004(3)   -0.002(4)
   C(19)  0.1
04(8)    0.072(6)    0.051(5)    -0.008(5)   0.005(5)    -0.001(4)
   C(20)
0.081(6)    0.058(5)    0.059(5)    0.015(4)    -0.001(4)   0.004(4)
   C(2
1)  0.19(2)     0.12(1)     0.052(6)    0.07(1)     -0.008(9)   -0.010(7)

C(22)  0.24(2)     0.10(1)     0.039(6)    -0.02(1)    0.003(9)    -0.005(6)

   C(23)  0.11(1)     0.19(2)     0.059(7)    -0.05(1)    0.005(6)    -0.030
(10)
   C(24)  0.57(6)     0.10(1)     0.09(1)     -0.12(2)    0.05(2)     -0
.009(10)
#-----------------------------------------------------------------
_computing_data_collection            'D*TREK'
_computing_cell
_refinement            'D*TREK'
_computing_data_reduction             'teXsa
n Ver. 1.11'
_computing_structure_solution          SAPI91
_computing_struct
ure_refinement       'SHELXL97'
_computing_publication_material       'teXsa
n Ver. 1.11'
_computing_molecular_graphics          ?
#-------------------------------------------------------------------
_geom_special_deta
ils
;
   ?
;
loop_
_geom_bond_atom_site_label_1
_geom_bond_atom_site_label_2
_
geom_bond_distance
_geom_bond_site_symmetry_1
_geom_bond_site_symmetry_2
_ge
om_bond_publ_flag
   Ag(1)     O(1)      2.486(8)   . . yes
   Ag(1)     O(1)
    2.486(8)   . 2_656 yes
   Ag(1)     C(6)      2.44(1)    . . yes
   Ag(1)
C(6)      2.44(1)    . 2_656 yes
   Ag(1)     C(7)      2.449(9)   . . yes
   Ag
(1)     C(7)      2.449(9)   . 2_656 yes
   Ag(2)     O(1)      2.519(8)   . 5
_455 yes
   Ag(2)     O(1)      2.519(8)   . 6_556 yes
   Ag(2)     C(13)     2.
337(9)   . . yes
   Ag(2)     C(13)     2.337(9)   . 2_556 yes
   Ag(2)     C(14
)     2.449(8)   . . yes
   Ag(2)     C(14)     2.449(8)   . 2_556 yes
   Cl(1)
     O(1)      1.44(1)    . . yes
   Cl(1)     O(2)      1.44(1)    . . yes
   Cl(
1)     O(3)      1.403(9)   . . yes
   Cl(1)     O(4)      1.39(1)    . . yes

C(1)      C(2)      1.35(2)    . . yes
   C(1)      C(18)     1.39(1)    . . y
es
   C(1)      H(1)      0.950      . . no
   C(2)      C(3)      1.40(2)    .
. yes
   C(2)      H(14)     0.950      . . no
   C(3)      C(4)      1.39(2)
. . yes
   C(3)      H(3)      0.950      . . no
   C(4)      C(5)      1.42(2)
    . . yes
   C(4)      H(4)      0.950      . . no
   C(5)      C(6)      1.45(1
)    . . yes
   C(5)      C(18)     1.43(1)    . . yes
   C(6)      C(7)      1.
35(1)    . . yes
   C(6)      H(5)      0.950      . . no
   C(7)      C(8)
1.44(1)    . . yes
   C(7)      H(6)      0.950      . . no
   C(8)      C(9)
    1.45(1)    . . yes
   C(8)      C(17)     1.41(1)    . . yes
   C(9)      C(10
)     1.41(1)    . . yes
   C(9)      C(19)     1.49(1)    . . yes
   C(10)
C(11)     1.43(1)    . . yes
   C(10)     C(15)     1.40(1)    . . yes
   C(11)
     C(12)     1.36(2)    . . yes
   C(11)     H(7)      0.950      . . no
   C(12
)     C(13)     1.44(1)    . . yes
   C(12)     H(8)      0.950      . . no
   C
(13)     C(14)     1.37(1)    . . yes
   C(13)     H(9)      0.950      . . no

   C(14)     C(15)     1.44(1)    . . yes
   C(14)     H(10)     0.950      . .
no
   C(15)     C(16)     1.43(1)    . . yes
   C(16)     C(17)     1.38(1)    .
. yes
   C(16)     C(20)     1.52(1)    . . yes
   C(17)     C(18)     1.52(1)
   . . yes
   C(19)     H(11)     0.950      . . no
   C(19)     H(12)     0.950
     . . no
   C(19)     H(13)     0.950      . . no
   C(20)     H(15)     0.950
      . . no
   C(20)     H(16)     0.950      . . no
   C(20)     H(17)     0.950
       . . no
   C(21)     C(22)     1.32(4)    . . yes
   C(21)     C(23)     1.3
8(4)    . 7_557 yes
   C(21)     H(18)     0.950      . . no
   C(22)     C(23)
     1.37(3)    . . yes
   C(22)     C(24)     1.47(3)    . . yes
   C(23)     H(1
9)     0.950      . . no
   C(24)     H(20)     0.950      . . no
   C(24)     H
(21)     0.950      . . no
   C(24)     H(22)     0.950      . . no
#-------------------------------------------------------------------
loop_

_geom_angle_atom_site_label_1
_geom_angle_atom_site_label_2
_geom_angle_atom
_site_label_3
_geom_angle
_geom_angle_site_symmetry_1
_geom_angle_site_symme
try_2
_geom_angle_site_symmetry_3
_geom_angle_publ_flag
     O(1)      Ag(1)
    O(1)      74.8(4)    . . 2_656 yes
     O(1)      Ag(1)     C(6)      99.1(4
)    . . . yes
     O(1)      Ag(1)     C(6)      94.0(4)    . . 2_656 yes

O(1)      Ag(1)     C(7)      100.5(3)   . . . yes
     O(1)      Ag(1)     C(
7)      125.5(3)   . . 2_656 yes
     O(1)      Ag(1)     C(6)      94.0(4)
2_656 . . yes
     O(1)      Ag(1)     C(6)      99.1(4)    2_656 . 2_656 yes

    O(1)      Ag(1)     C(7)      125.5(3)   2_656 . . yes
     O(1)      Ag(1)
     C(7)      100.5(3)   2_656 . 2_656 yes
     C(6)      Ag(1)     C(6)      1
63.5(5)   . . 2_656 yes
     C(6)      Ag(1)     C(7)      32.0(3)    . . . ye
s
     C(6)      Ag(1)     C(7)      135.3(3)   . . 2_656 yes
     C(6)      Ag(
1)     C(7)      135.3(3)   2_656 . . yes
     C(6)      Ag(1)     C(7)      3
2.0(3)    2_656 . 2_656 yes
     C(7)      Ag(1)     C(7)      122.6(4)   . .
2_656 yes
     O(1)      Ag(2)     O(1)      73.7(4)    5_455 . 6_556 yes
     O
(1)      Ag(2)     C(13)     98.1(4)    5_455 . . yes
     O(1)      Ag(2)
C(13)     96.0(4)    5_455 . 2_556 yes
     O(1)      Ag(2)     C(14)     130.
2(3)   5_455 . . yes
     O(1)      Ag(2)     C(14)     96.4(3)    5_455 . 2_5
56 yes
     O(1)      Ag(2)     C(13)     96.0(4)    6_556 . . yes
     O(1)
   Ag(2)     C(13)     98.1(4)    6_556 . 2_556 yes
     O(1)      Ag(2)     C(1
4)     96.4(3)    6_556 . . yes
     O(1)      Ag(2)     C(14)     130.2(3)
6_556 . 2_556 yes
     C(13)     Ag(2)     C(13)     162.4(4)   . . 2_556 yes

    C(13)     Ag(2)     C(14)     33.1(3)    . . . yes
     C(13)     Ag(2)
C(14)     133.8(3)   . . 2_556 yes
     C(13)     Ag(2)     C(14)     133.8(3)
    2_556 . . yes
     C(13)     Ag(2)     C(14)     33.1(3)    2_556 . 2_556 ye
s
     C(14)     Ag(2)     C(14)     123.5(4)   . . 2_556 yes
     O(1)      Cl(
1)     O(2)      105.3(7)   . . . yes
     O(1)      Cl(1)     O(3)      109.4
(6)   . . . yes
     O(1)      Cl(1)     O(4)      109.2(6)   . . . yes
     O(2
)      Cl(1)     O(3)      109.8(7)   . . . yes
     O(2)      Cl(1)     O(4)
      109.8(7)   . . . yes
     O(3)      Cl(1)     O(4)      112.9(6)   . . . y
es
     Ag(1)     O(1)      Ag(2)     105.8(4)   . . 5_545 yes
     Ag(1)     O(
1)      Cl(1)     122.7(5)   . . . yes
     Ag(2)     O(1)      Cl(1)     123.
0(5)   5_545 . . yes
     C(2)      C(1)      C(18)     122(1)     . . . yes

   C(2)      C(1)      H(1)      118.5      . . . no
     C(18)     C(1)      H(
1)      118.5      . . . no
     C(1)      C(2)      C(3)      121(1)     . .
. yes
     C(1)      C(2)      H(14)     119.4      . . . no
     C(3)      C(2)
       H(14)     119.5      . . . no
     C(2)      C(3)      C(4)      118(1)
    . . . yes
     C(2)      C(3)      H(3)      120.7      . . . no
     C(4)
   C(3)      H(3)      120.7      . . . no
     C(3)      C(4)      C(5)      12
0(1)     . . . yes
     C(3)      C(4)      H(4)      119.8      . . . no
     C
(5)      C(4)      H(4)      119.8      . . . no
     C(4)      C(5)      C(6)
       121.0(9)   . . . yes
     C(4)      C(5)      C(18)     119.4(9)   . . .
yes
     C(6)      C(5)      C(18)     119.5(9)   . . . yes
     Ag(1)     C(6)
      C(5)      107.0(6)   . . . yes
     Ag(1)     C(6)      C(7)      74.5(6)
    . . . yes
     Ag(1)     C(6)      H(5)      88.5       . . . no
     C(5)
   C(6)      C(7)      121.2(9)   . . . yes
     C(5)      C(6)      H(5)      1
19.4      . . . no
     C(7)      C(6)      H(5)      119.4      . . . no
     A
g(1)     C(7)      C(6)      73.5(6)    . . . yes
     Ag(1)     C(7)      C(8
)      109.1(6)   . . . yes
     Ag(1)     C(7)      H(6)      87.4       . .
. no
     C(6)      C(7)      C(8)      121.5(9)   . . . yes
     C(6)      C(7)
       H(6)      119.3      . . . no
     C(8)      C(7)      H(6)      119.3
    . . . no
     C(7)      C(8)      C(9)      117.9(8)   . . . yes
     C(7)
   C(8)      C(17)     121.2(8)   . . . yes
     C(9)      C(8)      C(17)     1
20.6(8)   . . . yes
     C(8)      C(9)      C(10)     117.5(8)   . . . yes

C(8)      C(9)      C(19)     119.6(8)   . . . yes
     C(10)     C(9)      C(
19)     122.9(8)   . . . yes
     C(9)      C(10)     C(11)     120.7(8)   . .
. yes
     C(9)      C(10)     C(15)     120.3(8)   . . . yes
     C(11)     C(1
0)     C(15)     119.0(8)   . . . yes
     C(10)     C(11)     C(12)     122.4
(9)   . . . yes
     C(10)     C(11)     H(7)      118.8      . . . no
     C(12
)     C(11)     H(7)      118.8      . . . no
     C(11)     C(12)     C(13)
    118.2(9)   . . . yes
     C(11)     C(12)     H(8)      120.9      . . . no

    C(13)     C(12)     H(8)      121.0      . . . no
     Ag(2)     C(13)     C
(12)     108.3(6)   . . . yes
     Ag(2)     C(13)     C(14)     78.0(5)    .
. . yes
     Ag(2)     C(13)     H(9)      83.9       . . . no
     C(12)     C(
13)     C(14)     121.3(9)   . . . yes
     C(12)     C(13)     H(9)      119.
3      . . . no
     C(14)     C(13)     H(9)      119.4      . . . no
     Ag(2
)     C(14)     C(13)     68.9(5)    . . . yes
     Ag(2)     C(14)     C(15)
     110.3(5)   . . . yes
     Ag(2)     C(14)     H(10)     90.8       . . . no

     C(13)     C(14)     C(15)     120.2(8)   . . . yes
     C(13)     C(14)
   H(10)     119.9      . . . no
     C(15)     C(14)     H(10)     119.9      .
. . no
     C(10)     C(15)     C(14)     118.8(8)   . . . yes
     C(10)     C(
15)     C(16)     121.5(8)   . . . yes
     C(14)     C(15)     C(16)     119.
6(8)   . . . yes
     C(15)     C(16)     C(17)     117.7(8)   . . . yes
     C(
15)     C(16)     C(20)     115.4(8)   . . . yes
     C(17)     C(16)     C(20
)     126.6(8)   . . . yes
     C(8)      C(17)     C(16)     121.2(8)   . . .
yes
     C(8)      C(17)     C(18)     116.6(8)   . . . yes
     C(16)     C(17)
      C(18)     122.0(8)   . . . yes
     C(1)      C(18)     C(5)      116.9(9)
    . . . yes
     C(1)      C(18)     C(17)     124.6(9)   . . . yes
     C(5)
    C(18)     C(17)     118.5(8)   . . . yes
     C(9)      C(19)     H(11)
109.5      . . . no
     C(9)      C(19)     H(12)     109.5      . . . no

C(9)      C(19)     H(13)     109.5      . . . no
     H(11)     C(19)     H(1
2)     109.5      . . . no
     H(11)     C(19)     H(13)     109.5      . . .
no
     H(12)     C(19)     H(13)     109.5      . . . no
     C(16)     C(20)
    H(15)     109.5      . . . no
     C(16)     C(20)     H(16)     109.5
. . . no
     C(16)     C(20)     H(17)     109.5      . . . no
     H(15)     C
(20)     H(16)     109.5      . . . no
     H(15)     C(20)     H(17)     109.
5      . . . no
     H(16)     C(20)     H(17)     109.5      . . . no
     C(22
)     C(21)     C(23)     125(2)     . . 7_557 yes
     C(22)     C(21)     H(
18)     116.9      . . . no
     C(23)     C(21)     H(18)     117.1      7_55
7 . . no
     C(21)     C(22)     C(23)     114(1)     . . . yes
     C(21)
C(22)     C(24)     123(2)     . . . yes
     C(23)     C(22)     C(24)     12
1(2)     . . . yes
     C(21)     C(23)     C(22)     119(2)     7_557 . . yes

     C(21)     C(23)     H(19)     120.3      7_557 . . no
     C(22)     C(23)
      H(19)     120.6      . . . no
     C(22)     C(24)     H(20)     109.5
   . . . no
     C(22)     C(24)     H(21)     109.4      . . . no
     C(22)
C(24)     H(22)     109.4      . . . no
     H(20)     C(24)     H(21)     109
.5      . . . no
     H(20)     C(24)     H(22)     109.5      . . . no
     H(2
1)     C(24)     H(22)     109.5      . . . no
#-------------------------------------------------------------------
loop_
_geom_contact_atom_
site_label_1
_geom_contact_atom_site_label_2
_geom_contact_distance
_geom_co
ntact_site_symmetry_1
_geom_contact_site_symmetry_2
_geom_contact_publ_flag

Ag(2)     O(1)      2.519(8)   . 5_455 ?
   Ag(2)     O(1)      2.519(8)   . 6
_556 ?
   O(2)      C(13)     3.38(2)    . 6_546 ?
   O(2)      C(14)     3.42(1
)    . 6_546 ?
   C(1)      C(17)     2.57(1)    . . ?
   C(1)      C(4)      2.
76(2)    . . ?
   C(1)      C(20)     3.00(1)    . . ?
   C(1)      C(16)     3.
06(1)    . . ?
   C(1)      C(19)     3.58(2)    . 2_656 ?
   C(2)      C(5)
   2.78(2)    . . ?
   C(3)      C(18)     2.83(2)    . . ?
   C(5)      C(17)
2.53(1)    . . ?
   C(5)      C(8)      2.85(1)    . . ?
   C(6)      C(17)
2.87(1)    . . ?
   C(6)      C(7)      3.33(1)    . 2_556 ?
   C(6)      C(6)
     3.55(2)    . 2_556 ?
   C(7)      C(18)     2.85(1)    . . ?
   C(7)      C(1
9)     2.86(1)    . . ?
   C(7)      C(7)      3.23(2)    . 2_556 ?
   C(8)
C(19)     2.54(1)    . . ?
   C(8)      C(15)     2.79(1)    . . ?
   C(9)
C(16)     2.86(1)    . . ?
   C(10)     C(19)     2.55(1)    . . ?
   C(10)
C(13)     2.80(1)    . . ?
   C(10)     C(17)     2.81(1)    . . ?
   C(11)
C(14)     2.79(1)    . . ?
   C(11)     C(19)     2.95(2)    . . ?
   C(12)
C(15)     2.84(1)    . . ?
   C(12)     C(14)     3.54(1)    . 2_656 ?
   C(12)
     C(22)     3.58(2)    . . ?
   C(13)     C(14)     3.28(1)    . 2_656 ?
   C(1
3)     C(13)     3.34(2)    . 2_656 ?
   C(14)     C(20)     2.82(1)    . . ?

C(14)     C(14)     3.41(1)    . 2_656 ?
   C(16)     C(18)     2.53(1)    . .
?
   C(17)     C(20)     2.59(1)    . . ?
   C(18)     C(20)     3.11(1)    . .
?
   C(21)     C(21)     2.60(5)    . 7_557 ?
   C(22)     C(22)     2.83(4)
. 7_557 ?
   C(23)     C(23)     2.71(4)    . 7_557 ?
#===END


Richard Eisenberg
Editor-in-Chief, Inorganic Chemistry
Department of Chemistry, Room B23
University of Rochester
Rochester, NY  14627-0216
Phone: (585) 275-4218
Toll Free Fax:  (800) 811-7721 (U.S. and Canada)
International Fax:  (585) 273-3596
E-mail:  inorg@chem.rochester.edu
